# Supplementary material for: L-Serine Supplementation Blunts Fasting-Induced Weight Regain by Increasing Brown Fat Thermogenesis
Source: MDPI journal article supplement (doi:10.3390/nu14091922), 2022-05-04
Supplement: s1 [file s1]

## Supplementary Information

**Table S1: qPCR primers**

|                                | Forward                 | Reverse                 |
|--------------------------------|-------------------------|-------------------------|
| <b>CD68</b>                    | TCACCTTGACCTGCTCTCTC    | AGGCCAATGATGAGAGGCAG    |
| <b>IL-6</b>                    | GTCGGAGGCTTAATTACACATGT | CAAGTGCATCATCGTTGTTCA   |
| <b>Npy</b>                     | ACCGGTGGTCTCTTCTCTCA    | CTTGTTACCTAGCATCGTGGC   |
| <b>Pepck</b>                   | CTGCATAACGGTCTGGACTTC   | CAGCAACTGCCCGTACTCC     |
| <b>Pgc1<math>\alpha</math></b> | AGCCGTGACCACTGACAACGAG  | GCTGCATGGTTCTGAGTGCTAAG |
| <b>Pomc</b>                    | GCGAGGCAAACAAGATTGG     | GAGGCACTGAACATCTTTGTC   |
| <b>Prdm16</b>                  | CCGCTGTGATGAGTGTGATG    | GGACGATCATGTGTTGCTCC    |
| <b>Tbp</b>                     | ACCCTTCACCAATGACTCCTATG | TGACTGCAGCAAATCGCTTGG   |
| <b>TNF<math>\alpha</math></b>  | CCCACGTCGTAGCAAACCA     | GTCTTTGAGATCCATGCCGTTG  |
| <b>Ucp1</b>                    | CTGCCAGGACAGTACCCAAG    | TCAGCTGTTCAAAGCACACA    |

### **Supplementary Figure 1. L-serine supplementation does not affect white adipose (WAT) tissue inflammation or cell size in ad libitum fed mice.**

**(a)** Body weight of ad libitum CD and HFD fed mice with or without L-serine supplementation starting at 8 weeks of age (CD:  $n=5$ ; HFD:  $n=4$ ; CD+L-ser, HFD+L-ser:  $n=6$ ). **(b)** Expression of inflammatory marker genes in SCF and PGF of CD and HFD fed mice with or without L-serine supplementation after 8 weeks starting at 4 weeks of age ( $n=8$ ). **(c)** Adipocyte size distribution of subcutaneous fat (SCF) and perigonadal fat (PGF) of random fed mice in CD and HFD with or without L-serine supplementation for 8 weeks starting at 4 weeks age ( $n=3$  animals >10000 cells per tissue and mouse). Adipocytes were grouped in different size categories. **(d)** Triglyceride content of liver from CD and HFD fed mice with or without L-serine supplementation for 8 weeks starting at 4 weeks of age **(e)** Serine content in liver of CD or HFD fed mice with or without L-serine supplementation for 8 weeks starting at 4 weeks of age ( $n=8$ ). **(f)** Liver weight of CD or

HFD fed mice with or without L-serine supplementation for 8 weeks starting at 4 weeks of age ( $n=8$ ). **(g)** Glycogen levels in livers of CD or HFD fed mice with or without L-serine supplementation for 8 weeks starting at 4 weeks of age ( $n=8$ ). **(h)** Pepck gene expression in liver of CD or HFD fed mice with or without L-serine supplementation for 8 weeks starting at 4 weeks of age ( $n=8$ ). **(i)** Pyruvate Tolerance test (PTT) of CD and HFD fed mice with or without L-serine supplementation after 1 week starting at 8 week of age (2mg/kg pyruvate;  $n=6$ ). Data are shown as mean  $\pm$  SEM, one or two way ANOVA with Tukey's post-hoc test.  $**p<0.01$ .

**Supplementary Figure 2. L-serine supplementation reduces white adipocyte size and white adipose tissue (WAT) inflammation upon fasting.**

**(a)** Liver weight of CD and HFD fed mice with or without L-serine supplementation after 8 weeks and repeated overnight fasting starting at 8 weeks of age ( $n=6$ ). **(b)** Triglyceride content 8 weeks ( $n=6$ ). **(c)** Representative H&E stainings of liver after 8 weeks. **(d)** Adipocyte sizes of SCF and PGF after 8 weeks and repeated overnight fasting starting at 8 weeks of age ( $n=4$  mice;  $>7000$  adipocytes per group for PGF and  $>10000$  adipocytes per group for SCF). Statistical analysis using a one-way ANOVA with a Tukey's post-hoc test revealed statistically significant differences between all groups in SCF and PGF. **(e)** Expression of inflammatory marker genes in PGF and SCF of fasted CD and HFD fed mice with or without L-serine supplementation after 8 weeks and repeated overnight fasting starting at 8 weeks of age (CD, HFD, HFD+L-ser :  $n=6$ ; CD+L-ser:  $n=4-5$ ). Data are shown as mean  $\pm$  SEM, one way ANOVA with Tukey's post-hoc test. \*  $p < 0.05$ , \*\*  $p < 0.01$ .

**Supplementary Figure 3. L-serine supplementation increases cumulative high fat diet intake in fasted mice.**

**(a)** Experimental setup for 16-week L-serine supplementation and indirect calorimetry measurement (TSE) in CD and HFD fed mice with and without L-serine supplementation. The figure was generated using Biorender.com. **(b)** Cumulative food intake of random fed and fasted CD and HFD fed mice with or without L-serine supplementation, starting at 8 weeks of age, at week 7(CD) or 8 (HFD) (CD random fed:  $n=5$ ; CD fasted, CD+L-ser random fed, CD+L-ser fasted:  $n=6$ ; HFD random fed:  $n=4$ ; HFD fasted, HFD+L-ser random fed, HFD+L-ser fasted:  $n=6$ ). **(c)** Average water intake (g) day total, light and dark phases of random fed and fasted CD and HFD fed mice with or without L-serine supplementation, starting at 8 weeks of age, at week 7(CD) or 8 (HFD) (CD random fed:  $n=5$ ; CD fasted, CD+L-ser random fed, CD+L-ser fasted:  $n=6$ ; HFD random fed:  $n=3$ ; HFD fasted:  $n=5$ ; HFD+L-ser random fed, HFD+L-ser fasted:  $n=6$ ). **(d)** mRNA expression of NPY and POMC from the hypothalamus of random fed and fasted CD and HFD fed mice with or without L-serine supplementation starting at 8 weeks of age, at week 16 (CD random fed:  $n=4$ ; CD fasted, CD+L-ser random fed, CD+L-ser fasted:  $n=6$ ; HFD random fed:  $n=4$ ; HFD fasted, HFD+L-ser random fed, HFD+L-ser fasted:  $n=6$ ). **(e)** Respiratory exchange ratio (RER) of random fed and fasted mice at week 7(CD) or 8 (HFD) (CD random fed:  $n=5$ ; CD fasted, CD+L-ser random fed, CD+L-ser fasted:  $n=6$ ; HFD random fed:  $n=4$ ; HFD fasted, HFD+L-ser random fed, HFD+L-ser fasted:  $n=6$ ). **(f)** Western blots of phosphorylated-HSL 563, Ser660, Ser565 and total HSL in PGF and SCF of random fed and fasted CD or HFD fed mice with or without L-serine supplementation for 8 weeks starting at 8 weeks of age ( $n=6$ ). Data are shown as mean  $\pm$  SEM, two way ANOVA with

Tukey's post-test. Data are shown as mean  $\pm$  SEM, two way ANOVA with Tukey's post-hoc test. \* $p < 0.05$ , \*\*  $p < 0.01$ ,  $p^{***} < 0.001$ ,  $p^{****} < 0.0001$ .

**Supplementary Figure 4. L-serine supplementation does not alter thermogenic gene expression in brown adipose tissue (BAT).**

**(a)** Average locomotor activity (counts) of random fed and fasted CD and HFD fed mice with or without L-serine supplementation at week 7(CD) or 8 (HFD) (CD random fed:  $n=5$ ; CD fasted, CD+L-ser random fed, CD+L-ser fasted:  $n=6$ ; HFD random fed:  $n=4$ ; HFD fasted, HFD+L-ser random fed, HFD+L-ser fasted:  $n=6$ ). **(b)** BAT weight of fasted CD and HFD fed mice with or without L-serine supplementation for 8 weeks starting at 8 weeks of age ( $n=6$ ). **(c)** mRNA expression of thermogenesis-related genes in BAT after 8 weeks starting at 8 weeks of age ( $n=6$ ). **(d)** Western blots for UCP1 of random fed and fasted CD or HFD fed mice with or without L-serine supplementation for 8 weeks starting at 8 weeks of age. Data are shown as mean  $\pm$  SEM, one or two way ANOVA with Tukey's post-hoc test. \* $p < 0.05$ .
