# Supplementary figures and images for: L-Serine Supplementation Blunts Fasting-Induced Weight Regain by Increasing Brown Fat Thermogenesis
Source: MDPI journal article supplement (doi:10.3390/nu14091922), 2022-05-04

Supplementary Figure 1

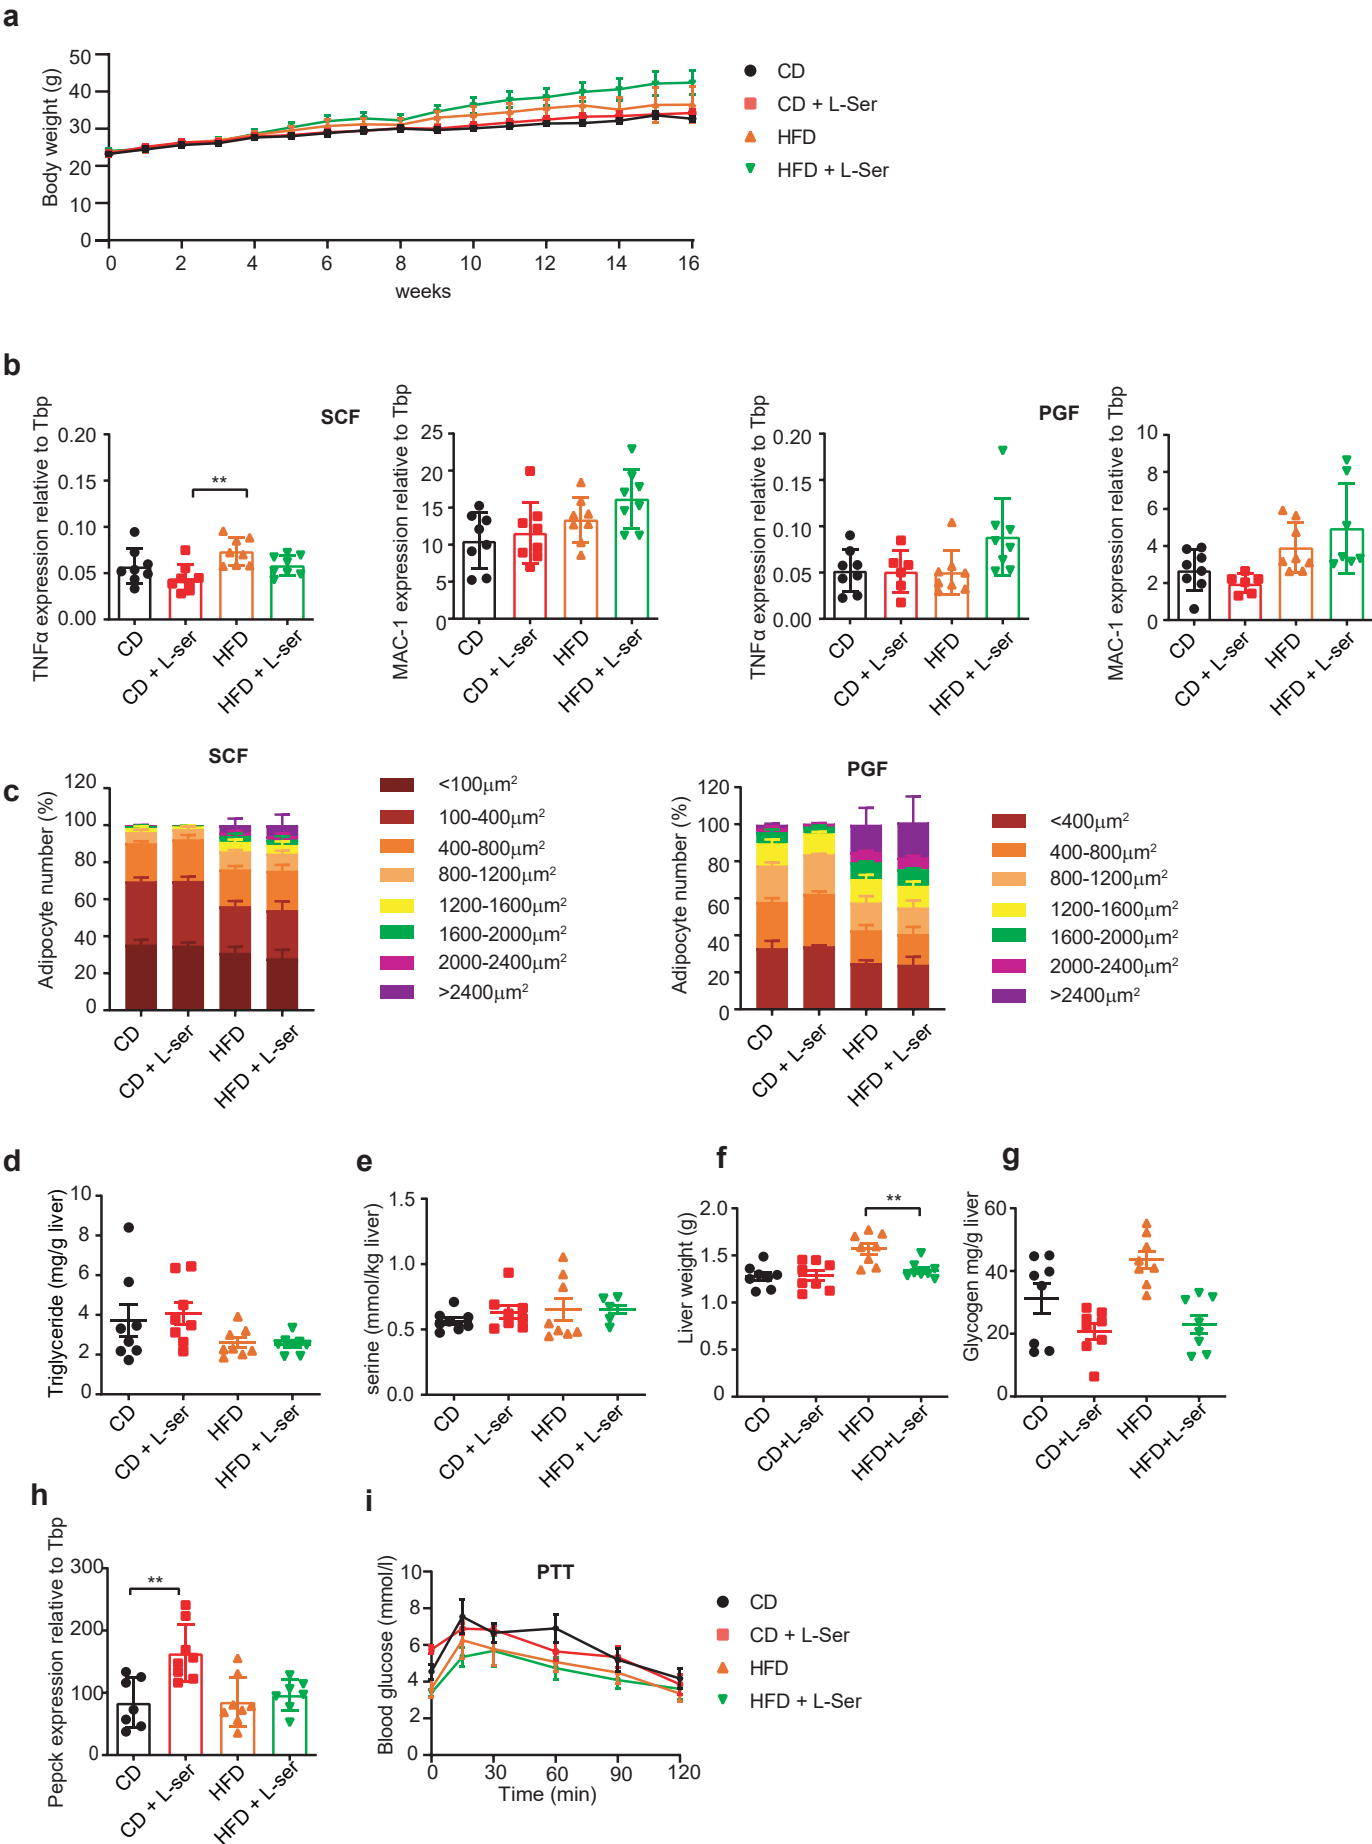

Supplementary Figure 2

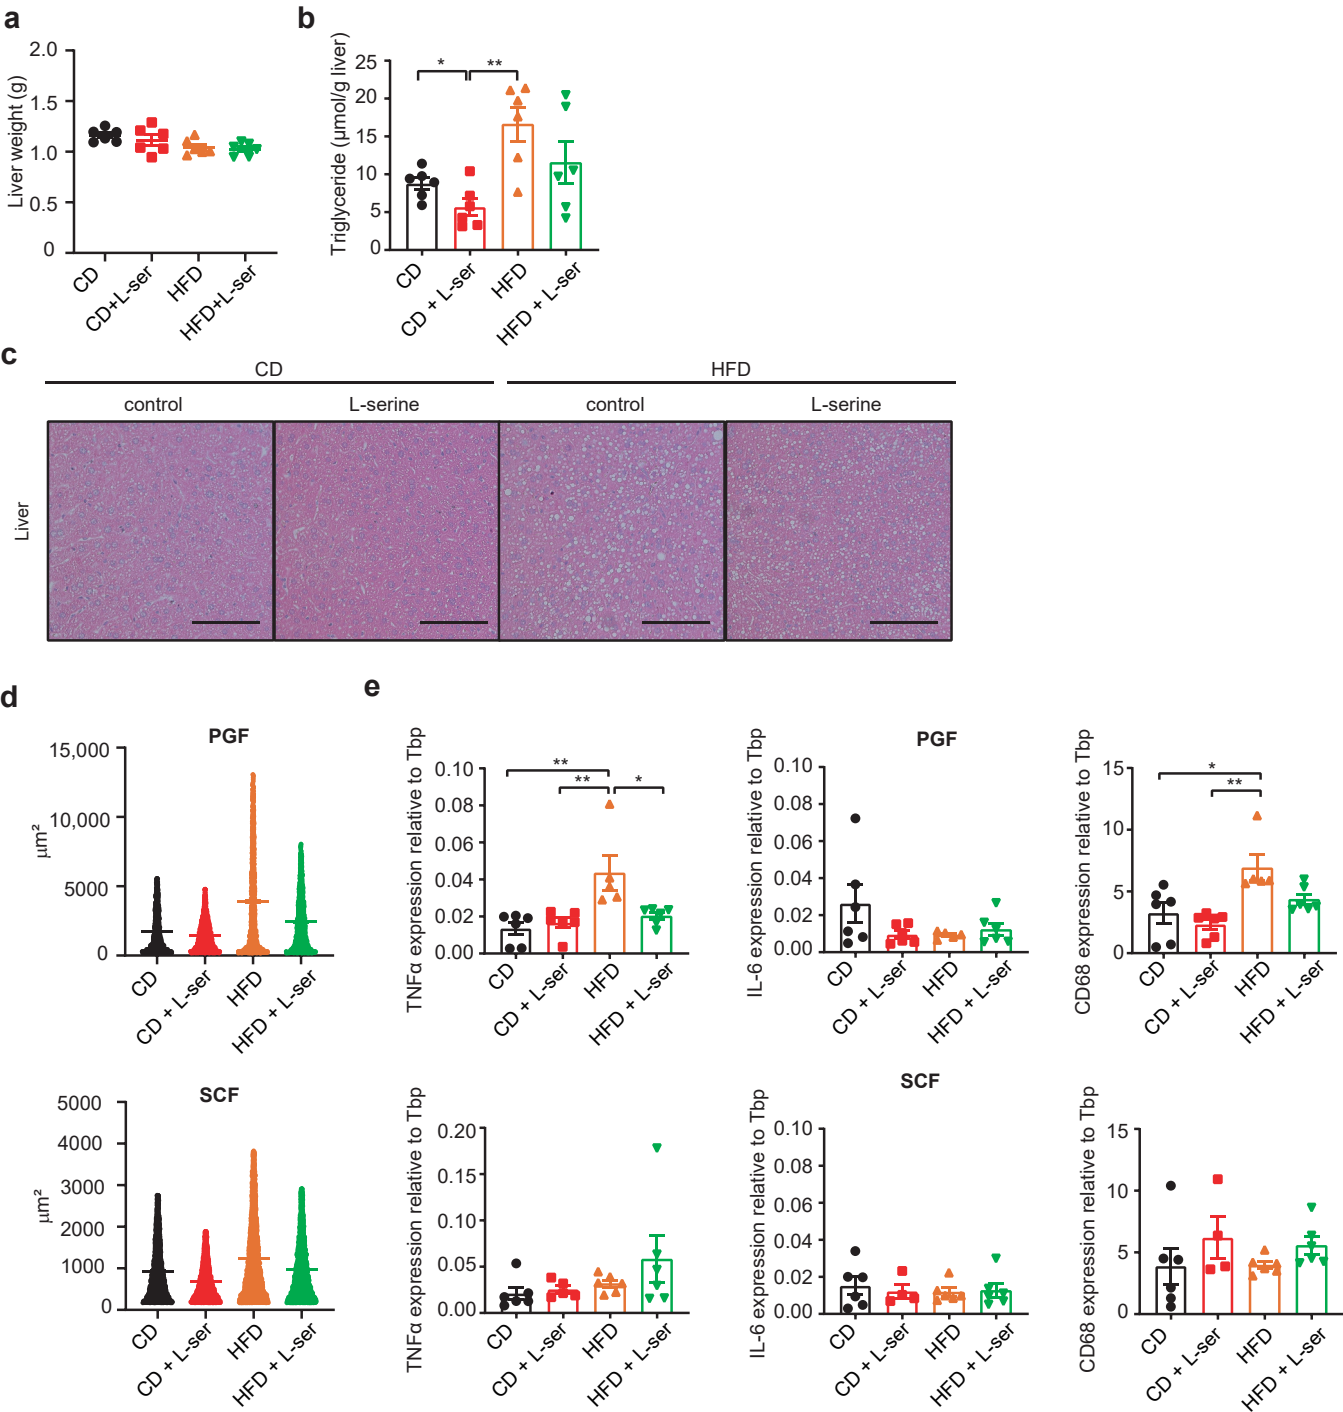

Supplementary Figure 3

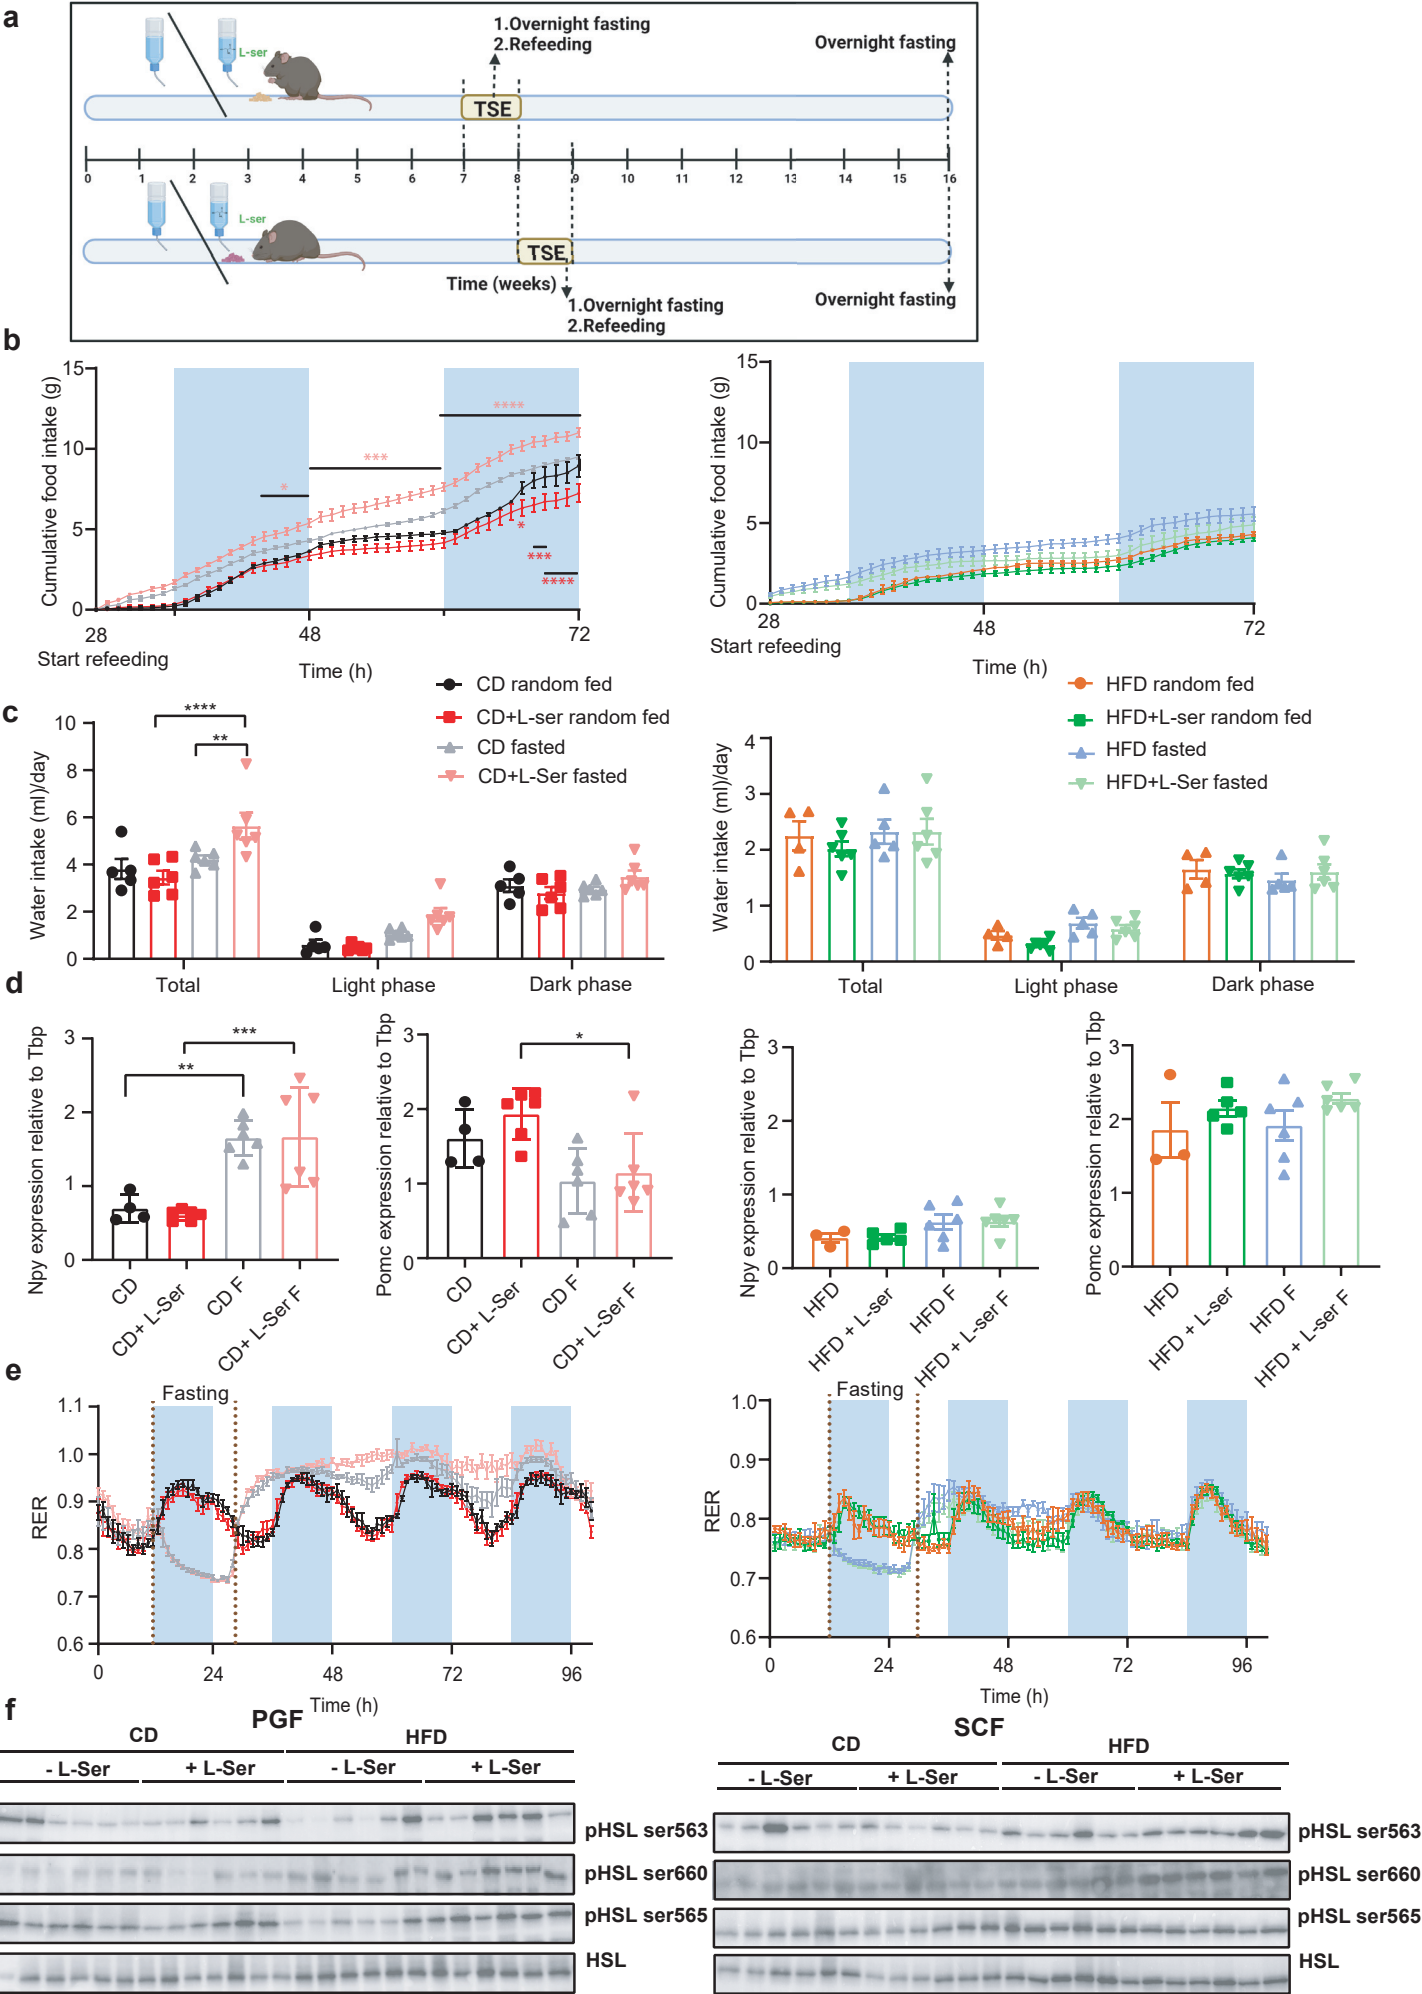

Supplementary Figure 4

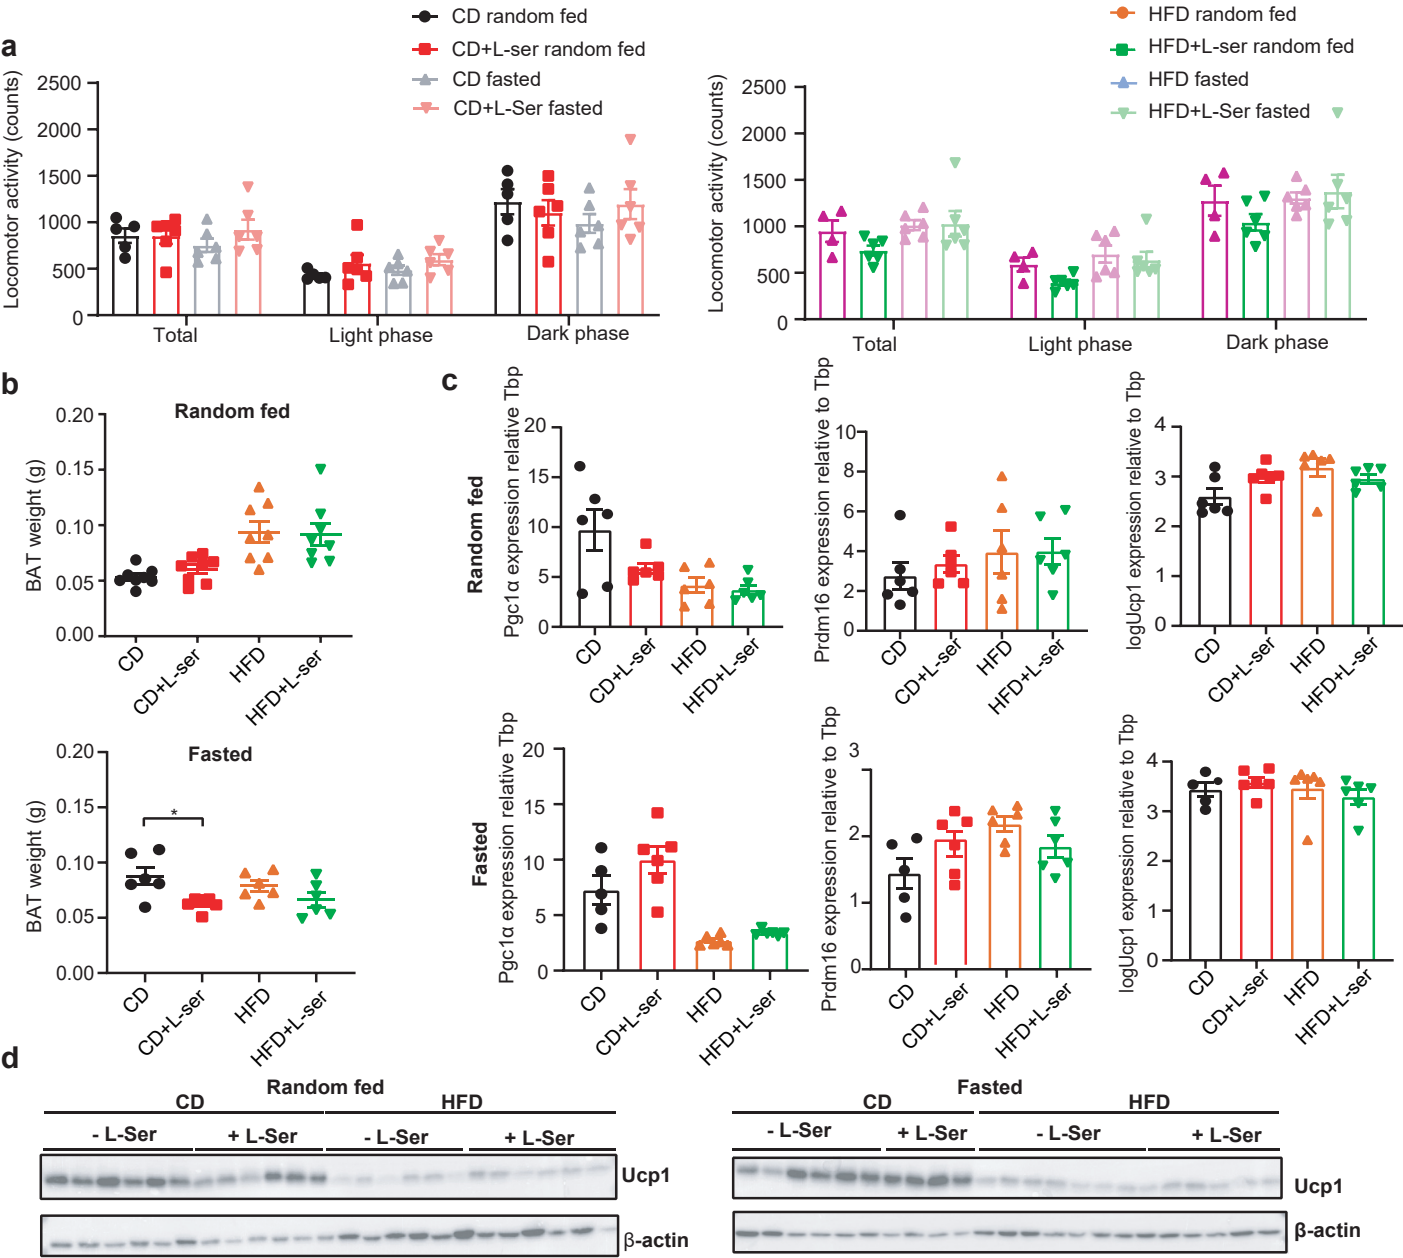

Supplement: s1 [file s1]
